# Supplementary material
Source: publisher site journal article supplement (http://content.karger.com/ProdukteDB/miscArchiv/000/255/651/000255651_sm_Suppl.-Material.pdf)
Supplement: Supplementary file 1 [file 000255651_sm_Suppl.-Material.pdf]

**HABITAT QUALITY AND THE RANGING ECOLOGY OF THE WOOLLY  
SPIDER MONKEYS (*BRACHYTELES HYPOXANTHUS*)<sup>1</sup>**

**SUPPLEMENTARY MATERIAL**

Wilson Marcelo da Silva Júnior<sup>2, 10</sup>

João Augusto Alves Meira-Neto<sup>2, 3, 4</sup>

Flávia Maria da Silva Carmo<sup>2, 3</sup>

Fabiano Rodrigues de Melo<sup>5, 6</sup>

Leandro Santana Moreira<sup>7</sup>

Elaine Ferreira Barbosa<sup>8</sup>

Luiz Gustavo Dias<sup>9</sup>

Carlos Augusto da Silva Peres<sup>10</sup>

Short title: Forest quality for woolly spider monkeys

**Keywords:** Atelinae, tropical forest, successional functional groups, forest structure, protein to fiber ratio, energy budget, conservation

1- Sponsored by FAPEMIG 1540/05, 61540/05, CAPES BEX 3291/06-5 and PROBIO 4600/04

2- Botanic Post-Graduate Program of Universidade Federal de Viçosa –UFV, 36570-000 Brazil

3- Vegetal Biology Department – UFV

4- Corresponding author: [j.meira@ufv.br](mailto:j.meira@ufv.br), Tel. +55 31 38991955 Fax +55 31 38992580

5- Universidade Federal de Goiás – UFG, Campus Jataí

6- Center of Ecological Studies and Environmental Education – CECO

7- Animal Biology Post Graduate Program of UFV

8- Animal Behavior Post-Graduate Program of Universidade Federal de Juiz de Fora – UFJF

9- Biodiverstas Foundation

10- School of Environmental Sciences, University of East Anglia

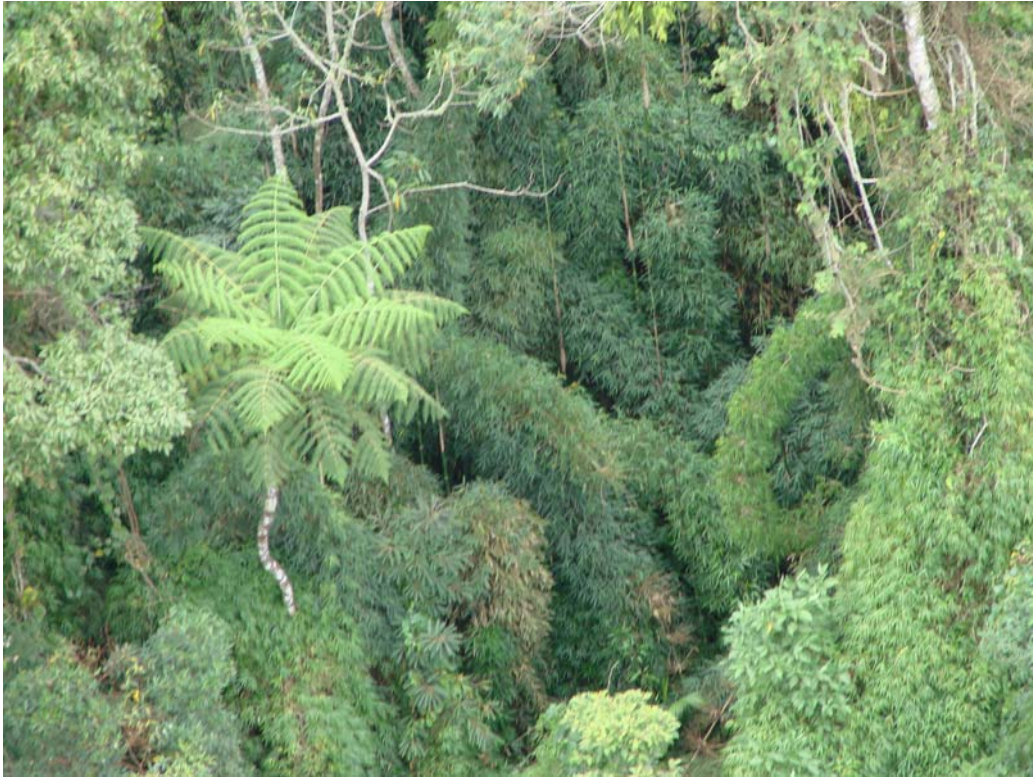

Figure 1- Aerial view of a large clump of *Chusquea capitata* Nees, an indigenous bamboo, at understory of the non-core area (NCA) of the woolly spider monkeys, Brigadeiro State Park, May, 2009. Photo by JAA Meira-Neto.

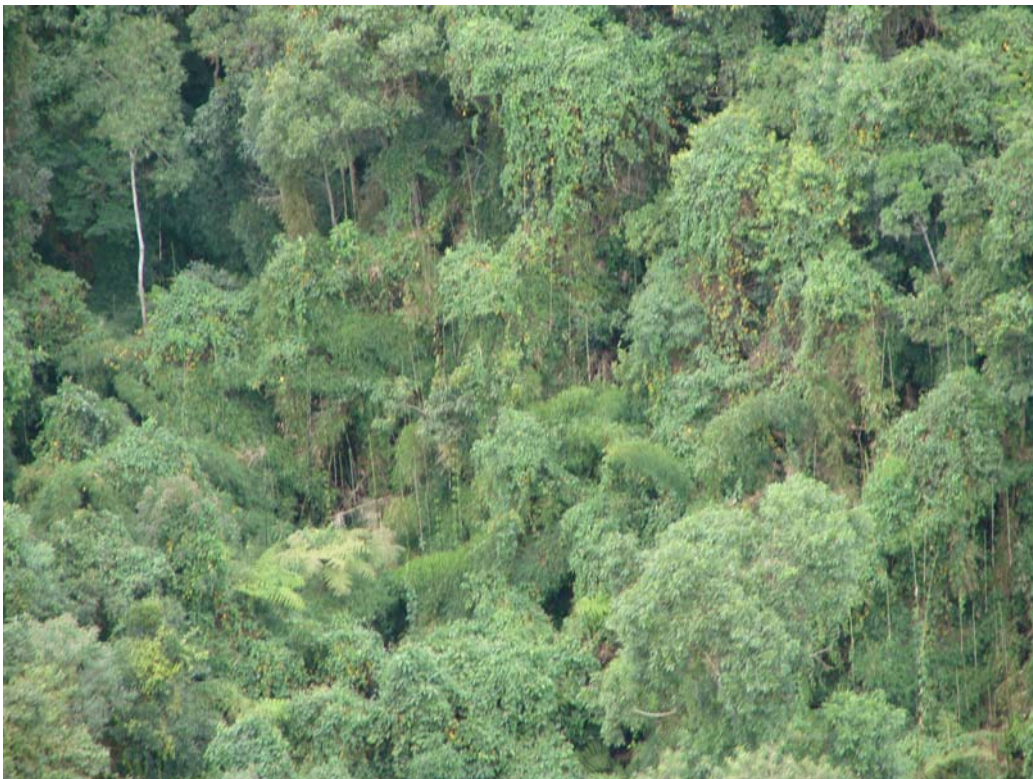

Figure 2- Aerial view of a cluster of large clumps of *Chusquea capitata* Nees among crowns of trees at the non-core area (NCA) of the woolly spider monkeys, Brigadeiro State Park, May, 2009. Photo by JAA Meira-Neto.

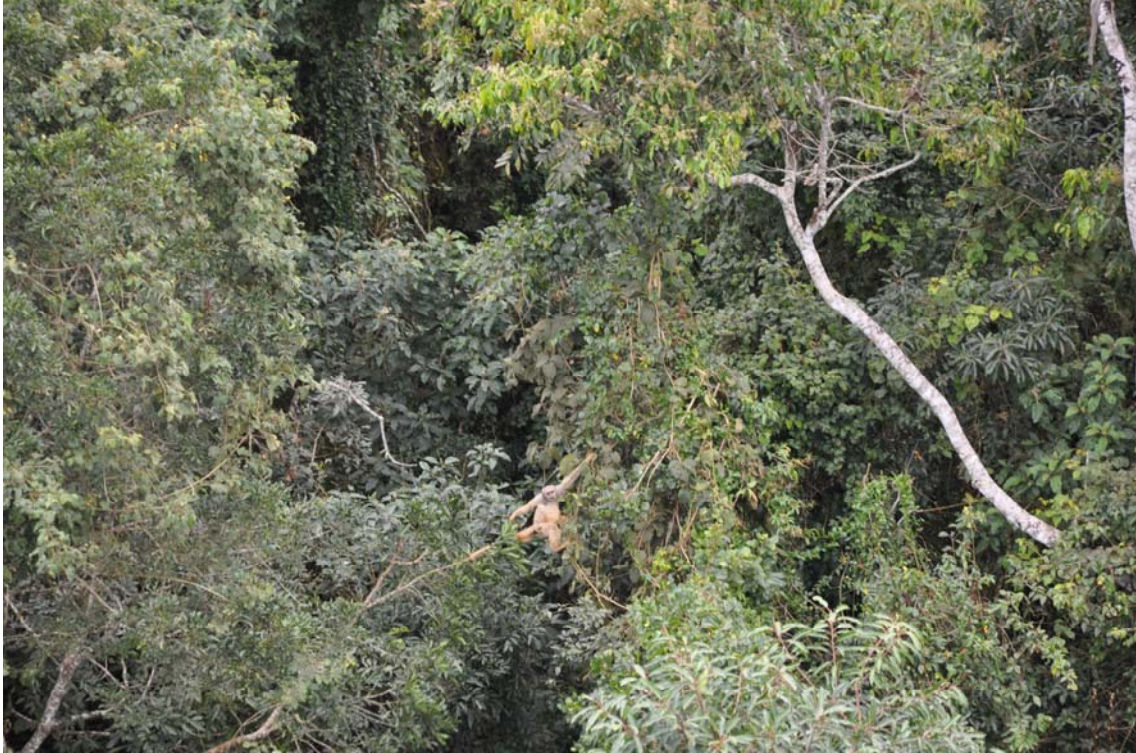

Figure 3- Aerial view of a monkey in a pathway of connected crowns at the core area (CA) of *Brachyteles hypoxanthus*, Brigadeiro State Park, May, 2009. Photo by BAP Cosenza.

## METHODS

These forests structures were described using the following parameters (Mueller-Dombois and Ellenberg, 1974; Newton, 2007):

N – Number of individuals sampled;

RA - relative abundance (the ratio of individuals of a tree species to total number of sampled trees);

AA – absolute abundance (the number of individuals of a tree species in one hectare (10.000m<sup>2</sup>));

RBA – relative basal area (the ratio of basal area of a tree species to total basal of the sample);

ABA – absolute basal area (the basal area of a tree species in one hectare);

FR – relative frequency (the ratio of number of sample units with a tree species to the sum of the number of sample units of each tree species);

IV – importance value (RA+RBA+FR).

## RESULTS

Table 1 – Structure parameters of the non-core area (NCA) of forest of The Brigadeiro State Park (BSP): N, sampled trees; RA, relative abundance; AA, absolute abundance (n/ha); RBA, relative basal area; ABA, absolute basal area (m<sup>2</sup>/ha); FR, frequency; IV, importance value; PF RATIO, protein-to-fibre ratio of most important species (IV), except those found only with leaves mature or young (without mix of both). \* are pioneer species, \*\* are late successional species.

| SPECIES                             | N  | RA    | AA    | RBA   | ABA    | FR   | IV    | PF RATIO |
|-------------------------------------|----|-------|-------|-------|--------|------|-------|----------|
| <i>Sapium glandulosum</i>           | 94 | 11.75 | 124.1 | 9.85  | 2.5065 | 9.91 | 31.51 | 0.581    |
| <i>Croton floribundus</i> *         | 56 | 7.00  | 73.2  | 14.71 | 3.7156 | 6.36 | 28.08 | 0.256    |
| <i>Solanum leucodendron</i>         | 63 | 7.88  | 82.3  | 11.70 | 2.9532 | 8.14 | 27.71 | 0.353    |
| <i>Alchornea triplinervia</i>       | 68 | 8.50  | 88.8  | 10.65 | 2.6884 | 7.84 | 26.99 | 0.322    |
| <i>Solanum cinnamomeum</i>          | 20 | 2.50  | 26.1  | 4.96  | 1.2523 | 2.51 | 9.97  | 0.353    |
| <i>Cyathea delgadii</i> **          | 33 | 4.13  | 43.1  | 1.81  | 0.4574 | 3.70 | 9.63  | 0.259    |
| <i>Psychotria capitata</i>          | 23 | 2.88  | 30.0  | 1.11  | 0.2792 | 2.96 | 6.94  | 0.320    |
| <i>Vernonia diffusa</i>             | 14 | 1.75  | 27.4  | 2.64  | 0.5463 | 1.63 | 6.01  | 0.329    |
| <i>Myrsine umbellata</i> *          | 20 | 2.50  | 18.3  | 1.20  | 0.6656 | 2.22 | 5.92  | 0.182    |
| <i>Acalypha brasiliensis</i>        | 20 | 2.50  | 26.1  | 1.49  | 0.3025 | 1.78 | 5.76  | 0.431    |
| <i>Cecropia glaziovii</i> *         | 12 | 1.50  | 15.7  | 1.46  | 0.3677 | 1.63 | 4.58  | 0.320    |
| <i>Nectandra oppositifolia</i>      | 6  | 0.75  | 7.8   | 2.79  | 0.7042 | 0.89 | 4.43  | 0.207    |
| <i>Solanum swartzianum</i>          | 12 | 1.50  | 15.7  | 0.76  | 0.1913 | 1.48 | 3.74  | 0.359    |
| <i>Miconia tristis</i>              | 12 | 1.50  | 15.7  | 0.70  | 0.1772 | 1.48 | 3.68  | 0.357    |
| <i>Croton sp</i>                    | 14 | 1.75  | 18.3  | 0.50  | 0.1269 | 1.18 | 3.44  | 0.440    |
| <i>Cyathea rufa</i>                 | 11 | 1.38  | 14.4  | 0.84  | 0.2114 | 1.18 | 3.40  | 0.241    |
| <i>Bathysa meridionalis</i>         | 12 | 1.50  | 15.7  | 0.55  | 0.1395 | 1.33 | 3.38  | 0.270    |
| <i>Clusia arrudea</i>               | 7  | 0.88  | 9.1   | 1.37  | 0.3452 | 1.04 | 3.28  | 0.131    |
| <i>Erythrina falcata</i>            | 8  | 1.00  | 10.5  | 1.07  | 0.2692 | 1.18 | 3.25  | 0.356    |
| <i>Lauraceae 1</i>                  | 3  | 0.38  | 3.9   | 2.32  | 0.5868 | 0.44 | 3.14  |          |
| <i>Aspidosperma parvifolium</i>     | 9  | 1.13  | 13.1  | 0.77  | 0.1951 | 1.18 | 3.08  | 0.349    |
| <i>Myrsine ferruginea</i>           | 10 | 1.25  | 11.8  | 0.42  | 0.1068 | 1.33 | 3.00  | 0.171    |
| <i>Inga laurina</i> *               | 9  | 1.13  | 10.5  | 0.41  | 0.1030 | 1.33 | 2.86  | 0.288    |
| <i>Guatteria nigrescens</i> **      | 8  | 1.00  | 11.8  | 0.40  | 0.1000 | 1.18 | 2.58  | 0.225    |
| <i>Eupatorium inulifolium</i>       | 9  | 1.13  | 2.6   | 0.53  | 0.1336 | 0.89 | 2.54  | 0.457    |
| <i>Indeterminada 2</i>              | 2  | 0.25  | 9.1   | 1.80  | 0.4555 | 0.30 | 2.35  |          |
| <i>Persea pyrifolia</i>             | 7  | 0.88  | 7.8   | 0.58  | 0.1469 | 0.89 | 2.34  | 0.228    |
| <i>Dasyphyllum microcephala</i>     | 6  | 0.75  | 9.1   | 0.69  | 0.1739 | 0.89 | 2.33  | 0.283    |
| <i>Psychotria sessilis</i>          | 7  | 0.88  | 9.1   | 0.22  | 0.0544 | 1.04 | 2.13  | 0.320    |
| <i>Trichilia magnifoliola</i>       | 7  | 0.88  | 7.8   | 0.19  | 0.0491 | 1.04 | 2.11  | 0.265    |
| <i>Aegiphila sellowiana</i> *       | 6  | 0.75  | 7.8   | 0.42  | 0.1061 | 0.89 | 2.06  | 0.321    |
| <i>Lamanonia ternata</i>            | 6  | 0.75  | 6.5   | 0.38  | 0.0971 | 0.89 | 2.02  | 0.225    |
| <i>Ocotea odorifera</i> **          | 5  | 0.63  | 6.5   | 0.50  | 0.1332 | 0.74 | 1.87  | 0.177    |
| <i>Inga sessilis</i> *              | 4  | 0.50  | 5.2   | 0.73  | 0.1274 | 0.59 | 1.82  | 0.279    |
| <i>Annona cacans</i>                | 5  | 0.63  | 6.5   | 0.45  | 0.1833 | 0.74 | 1.82  | 0.350    |
| <i>Cabrlea canjerana</i>            | 6  | 0.75  | 7.8   | 0.30  | 0.1139 | 0.74 | 1.79  |          |
| <i>Sorocea bonplandii</i>           | 6  | 0.75  | 7.8   | 0.23  | 0.0752 | 0.74 | 1.72  | 0.271    |
| <i>Calyptanthes clusiaefolia</i> ** | 6  | 0.75  | 7.8   | 0.20  | 0.0586 | 0.74 | 1.69  | 0.190    |
| <i>Piptocarpha macropoda</i> *      | 4  | 0.50  | 5.2   | 0.59  | 0.0501 | 0.59 | 1.68  | 0.269    |

To be continued...

Table 1 - Continuation

| SPECIES                            | N | RA   | AA  | RBA  | ABA    | FR   | IV   | PF<br>RATIO |
|------------------------------------|---|------|-----|------|--------|------|------|-------------|
| <i>Lonchocarpus muehlbergianus</i> | 2 | 0.25 | 2.6 | 1.24 | 0.1483 | 0.15 | 1.63 |             |
| <i>Nectandra cuspidata</i>         | 4 | 0.50 | 5.2 | 0.52 | 0.3122 | 0.59 | 1.61 | 0.237       |
| <i>Allophylus edulis</i>           | 4 | 0.50 | 5.2 | 0.51 | 0.1296 | 0.59 | 1.61 | 0.242       |
| <i>Piper sp1</i>                   | 5 | 0.63 | 6.5 | 0.12 | 0.1064 | 0.74 | 1.48 | 0.574       |
| <i>Guapira opposita</i>            | 3 | 0.38 | 6.5 | 0.77 | 0.0302 | 0.30 | 1.44 |             |
| <i>Machaerium cf. vestitum</i>     | 5 | 0.63 | 5.2 | 0.18 | 0.0462 | 0.59 | 1.40 | 0.310       |
| <i>Miconia eichleri</i>            | 4 | 0.50 | 6.5 | 0.29 | 0.0735 | 0.59 | 1.38 | 0.311       |
| <i>Kielmeyera albopunctata</i>     | 5 | 0.63 | 5.2 | 0.16 | 0.0393 | 0.59 | 1.37 | 0.224       |
| <i>Cinnamomum glaziovii</i>        | 4 | 0.50 | 3.9 | 0.24 | 0.0605 | 0.59 | 1.33 | 0.169       |
| <i>Trichilia hirta</i>             | 3 | 0.38 | 2.6 | 0.51 | 0.1278 | 0.44 | 1.32 | 0.250       |
| <i>Schefflera sp</i>               | 2 | 0.25 | 5.2 | 0.77 | 0.1937 | 0.30 | 1.31 | 0.242       |
| <i>Psychotria sp</i>               | 4 | 0.50 | 5.2 | 0.15 | 0.0372 | 0.59 | 1.24 |             |
| <i>Campomanesia guaviroba**</i>    | 4 | 0.50 | 1.3 | 0.10 | 0.0251 | 0.59 | 1.19 | 0.259       |
| <i>Pouteria sp</i>                 | 1 | 0.13 | 3.9 | 0.85 | 0.2156 | 0.15 | 1.13 |             |
| <i>Cordia sellowiana</i>           | 3 | 0.38 | 3.9 | 0.30 | 0.0761 | 0.44 | 1.12 | 0.229       |
| <i>Ocotea grandiflora</i>          | 3 | 0.38 | 1.3 | 0.43 | 0.1076 | 0.30 | 1.10 |             |
| <i>Maytenus evonymoides</i>        | 3 | 0.38 | 3.9 | 0.25 | 0.1951 | 0.44 | 1.07 | 0.236       |
| <i>Siparuna guianensis</i>         | 1 | 0.13 | 3.9 | 0.77 | 0.0558 | 0.15 | 1.05 |             |
| <i>Tapirira guianensis</i>         | 3 | 0.38 | 3.9 | 0.22 | 0.0487 | 0.44 | 1.04 | 0.201       |
| <i>Trichilia silvatica</i>         | 3 | 0.38 | 3.9 | 0.19 | 0.0477 | 0.44 | 1.01 | 0.254       |
| <i>Allophylus sericeus</i>         | 3 | 0.38 | 3.9 | 0.19 | 0.0454 | 0.44 | 1.01 |             |
| <i>Miconia budlejoides</i>         | 3 | 0.38 | 3.9 | 0.18 | 0.0402 | 0.44 | 1.00 | 0.301       |
| <i>Cedrella fissilis</i>           | 3 | 0.38 | 3.9 | 0.16 | 0.0374 | 0.44 | 0.98 | 0.196       |
| <i>Ocotea minarum</i>              | 3 | 0.38 | 3.9 | 0.15 | 0.0321 | 0.44 | 0.97 |             |
| <i>Zanthoxylum rhoifolium</i>      | 3 | 0.38 | 3.9 | 0.13 | 0.0293 | 0.44 | 0.95 |             |
| <i>Pouteria laurifolia</i>         | 3 | 0.38 | 2.6 | 0.12 | 0.0242 | 0.44 | 0.93 | 0.208       |
| <i>Eupatorium angulicaule</i>      | 3 | 0.38 | 2.6 | 0.10 | 0.0911 | 0.44 | 0.91 |             |
| <i>Vernonanthura discolor</i>      | 2 | 0.25 | 3.9 | 0.36 | 0.0843 | 0.30 | 0.91 | 0.329       |
| <i>Miconia sellowiana</i>          | 2 | 0.25 | 2.6 | 0.33 | 0.0150 | 0.30 | 0.88 |             |
| <i>Cupania vernalis</i>            | 3 | 0.38 | 2.6 | 0.06 | 0.0808 | 0.44 | 0.88 |             |
| <i>Dalbergia foliolosa</i>         | 2 | 0.25 | 2.6 | 0.32 | 0.0746 | 0.30 | 0.87 |             |
| <i>Trichilia pallida</i>           | 2 | 0.25 | 1.3 | 0.30 | 0.0714 | 0.30 | 0.84 |             |
| <i>Citronella megaphylla</i>       | 2 | 0.25 | 2.6 | 0.28 | 0.1351 | 0.30 | 0.83 |             |
| <i>Cecropia hololeuca</i>          | 1 | 0.13 | 2.6 | 0.54 | 0.0645 | 0.15 | 0.81 |             |
| <i>Miconia cf. latecrenada</i>     | 2 | 0.25 | 2.6 | 0.26 | 0.0617 | 0.30 | 0.80 |             |
| <i>Chrysophyllum gonocarpum</i>    | 2 | 0.25 | 2.6 | 0.24 | 0.0565 | 0.30 | 0.79 |             |
| <i>Sloanea guianensis</i>          | 2 | 0.25 | 1.3 | 0.22 | 0.0560 | 0.30 | 0.77 |             |
| <i>Nectandra lanceolata</i>        | 2 | 0.25 | 2.6 | 0.22 | 0.1213 | 0.30 | 0.77 |             |
| <i>Rollinia sylvatica</i>          | 1 | 0.13 | 1.3 | 0.48 | 0.0468 | 0.15 | 0.75 |             |
| <i>Casearia arborea</i>            | 2 | 0.25 | 2.6 | 0.19 | 0.1040 | 0.30 | 0.73 |             |
| <i>Persea sp</i>                   | 1 | 0.13 | 2.6 | 0.41 | 0.0346 | 0.15 | 0.68 |             |

To be continued...

Table 1 - Continuation

| SPECIES                              | N | RA   | AA  | RBA  | ABA    | FR   | IV   | PF<br>RATIO |
|--------------------------------------|---|------|-----|------|--------|------|------|-------------|
| <i>Tibouchinia forthergillae</i>     | 2 | 0.25 | 1.3 | 0.14 | 0.0243 | 0.30 | 0.68 |             |
| <i>Casearia obliqua</i>              | 2 | 0.25 | 2.6 | 0.10 | 0.0877 | 0.30 | 0.64 |             |
| <i>Sloanea sp</i>                    | 1 | 0.13 | 2.6 | 0.35 | 0.0128 | 0.15 | 0.62 |             |
| <i>Bathysa cuspidata</i>             | 2 | 0.25 | 2.6 | 0.05 | 0.0111 | 0.30 | 0.60 |             |
| <i>Meriania sp</i>                   | 2 | 0.25 | 2.6 | 0.04 | 0.0103 | 0.30 | 0.59 |             |
| <i>Indeterminada 1</i>               | 2 | 0.25 | 1.3 | 0.04 | 0.0053 | 0.30 | 0.59 |             |
| <i>Rollinia sericea</i>              | 2 | 0.25 | 1.3 | 0.02 | 0.0742 | 0.30 | 0.57 |             |
| <i>Miconia sp</i>                    | 1 | 0.13 | 1.3 | 0.29 | 0.0708 | 0.15 | 0.57 |             |
| <i>Sclerolobium rugosum</i>          | 1 | 0.13 | 1.3 | 0.28 | 0.0673 | 0.15 | 0.55 |             |
| <i>Matayba elaeagnoides</i>          | 1 | 0.13 | 1.3 | 0.27 | 0.0607 | 0.15 | 0.54 |             |
| <i>Sloanea monosperma</i>            | 1 | 0.13 | 1.3 | 0.24 | 0.0585 | 0.15 | 0.51 |             |
| <i>Ocotea nitidula</i>               | 1 | 0.13 | 1.3 | 0.23 | 0.0575 | 0.15 | 0.50 |             |
| <i>Micropholis sp</i>                | 1 | 0.13 | 1.3 | 0.23 | 0.0325 | 0.15 | 0.50 |             |
| <i>Meliosma itatiaiae</i>            | 1 | 0.13 | 1.3 | 0.17 | 0.0265 | 0.15 | 0.44 |             |
| <i>Mollinedia argyrogyna</i>         | 1 | 0.13 | 1.3 | 0.13 | 0.0258 | 0.15 | 0.40 |             |
| <i>Symplocos celastrina</i>          | 1 | 0.13 | 1.3 | 0.10 | 0.0215 | 0.15 | 0.38 |             |
| <i>Micropholis crassipedicellata</i> | 1 | 0.13 | 1.3 | 0.10 | 0.0209 | 0.15 | 0.38 |             |
| <i>Symplocos cf. variabilis</i>      | 1 | 0.13 | 1.3 | 0.09 | 0.0191 | 0.15 | 0.36 |             |
| <i>Piper gigantifolium</i>           | 1 | 0.13 | 1.3 | 0.08 | 0.0183 | 0.15 | 0.36 |             |
| <i>Pausandra morisiana</i>           | 1 | 0.13 | 1.3 | 0.08 | 0.0142 | 0.15 | 0.35 |             |
| <i>Styrax cf. ferrugineus</i>        | 1 | 0.13 | 1.3 | 0.07 | 0.0142 | 0.15 | 0.35 |             |
| <i>Coussapoa microcarpa</i>          | 1 | 0.13 | 1.3 | 0.06 | 0.0138 | 0.15 | 0.33 |             |
| <i>Cedrella odorata</i>              | 1 | 0.13 | 1.3 | 0.06 | 0.0138 | 0.15 | 0.33 |             |
| <i>Astronium sp</i>                  | 1 | 0.13 | 1.3 | 0.05 | 0.0124 | 0.15 | 0.33 |             |
| <i>Eugenia catharinensis</i>         | 1 | 0.13 | 1.3 | 0.05 | 0.0117 | 0.15 | 0.33 |             |
| <i>Tibouchina sp</i>                 | 1 | 0.13 | 1.3 | 0.05 | 0.0113 | 0.15 | 0.32 |             |
| <i>Clethra scabra</i>                | 1 | 0.13 | 1.3 | 0.05 | 0.0101 | 0.15 | 0.32 |             |
| <i>Tibouchina granulosa</i>          | 1 | 0.13 | 1.3 | 0.04 | 0.0086 | 0.15 | 0.32 |             |
| <i>Sapotaceae 1</i>                  | 1 | 0.13 | 1.3 | 0.04 | 0.0081 | 0.15 | 0.31 |             |
| <i>Calypttranthes lucida</i>         | 1 | 0.13 | 1.3 | 0.03 | 0.0076 | 0.15 | 0.31 |             |
| <i>Symplocos pubescens</i>           | 1 | 0.13 | 1.3 | 0.03 | 0.0076 | 0.15 | 0.31 |             |
| <i>Miconia fothergilla</i>           | 1 | 0.13 | 1.3 | 0.03 | 0.0073 | 0.15 | 0.30 |             |
| <i>Ocotea velutina</i>               | 1 | 0.13 | 1.3 | 0.03 | 0.0067 | 0.15 | 0.30 |             |
| <i>Eugenia lucida</i>                | 1 | 0.13 | 1.3 | 0.03 | 0.0062 | 0.15 | 0.30 |             |
| <i>Myrsine lineata</i>               | 1 | 0.13 | 1.3 | 0.03 | 0.0057 | 0.15 | 0.30 |             |
| <i>Tibouchina arborea</i>            | 1 | 0.13 | 1.3 | 0.02 | 0.0049 | 0.15 | 0.30 |             |
| <i>Eugenia involucrata</i>           | 1 | 0.13 | 1.3 | 0.02 | 0.0048 | 0.15 | 0.30 |             |
| <i>Ocotea teleiandra</i>             | 1 | 0.13 | 1.3 | 0.02 | 0.0045 | 0.15 | 0.29 |             |
| <i>Rubiaceae 1</i>                   | 1 | 0.13 | 1.3 | 0.02 | 0.0044 | 0.15 | 0.29 |             |
| <i>Rheedia gardneriana</i>           | 1 | 0.13 | 1.3 | 0.02 | 0.0043 | 0.15 | 0.29 |             |
| <i>Amaioua guianensis</i>            | 1 | 0.13 | 1.3 | 0.02 | 0.0042 | 0.15 | 0.29 |             |

To be continued...

Table 1 - Continuation

| SPECIES                      | N | RA   | AA  | RBA  | ABA    | FR   | IV   | PF<br>RATIO |
|------------------------------|---|------|-----|------|--------|------|------|-------------|
| <i>Miconia theizans</i>      | 1 | 0.13 | 1.3 | 0.02 | 0.0042 | 0.15 | 0.29 |             |
| <i>Fuchsia sp</i>            | 1 | 0.13 | 1.3 | 0.02 | 0.0040 | 0.15 | 0.29 |             |
| <i>Myrcia fallax</i>         | 1 | 0.13 | 1.3 | 0.02 | 0.0039 | 0.15 | 0.29 |             |
| <i>Actinostemom sp</i>       | 1 | 0.13 | 1.3 | 0.02 | 0.0038 | 0.15 | 0.29 |             |
| <i>Euterpe edulis</i>        | 1 | 0.13 | 1.3 | 0.02 | 0.0031 | 0.15 | 0.29 |             |
| <i>Myrtaceae 1</i>           | 1 | 0.13 | 1.3 | 0.01 | 0.0030 | 0.15 | 0.29 |             |
| <i>Randia armata</i>         | 1 | 0.13 | 1.3 | 0.01 | 0.0030 | 0.15 | 0.29 |             |
| <i>Miconia mendocaei</i>     | 1 | 0.13 | 1.3 | 0.01 | 0.0023 | 0.15 | 0.28 |             |
| <i>Piper sp 2</i>            | 1 | 0.13 | 1.3 | 0.01 | 0.0001 | 0.15 | 0.28 |             |
| <i>Ocotea cf. acutangula</i> | 1 | 0.13 | 1.3 | 0.01 | 0.0023 | 0.15 | 0.28 |             |

Table 2 – Structure parameters of the core area (CA) of forest of The Brigadeiro State Park (BSP): N, sampled trees; RA, relative abundance; AA, absolute abundance (n/ha); RBA, relative basal area; ABA, absolute basal area (m<sup>2</sup>/ha); FR, frequency; IV, importance value; PF RATIO, protein-to-fibre ratio of most important species (IV), except those found only with leaves mature or young (without mix of both). \* are pioneer, \*\* are late successional species.

| SPECIES                          | N  | RA   | AA    | RBA  | ABA   | FR   | IV    | PF RATIO |
|----------------------------------|----|------|-------|------|-------|------|-------|----------|
| <i>Huberia sellowiana</i>        | 43 | 5.38 | 157.1 | 5    | 2.319 | 18.5 | 15.5  | 0.246    |
| <i>Ixora gardneriana</i>         | 44 | 5.5  | 160.8 | 3.36 | 1.56  | 17   | 13.57 | 0.297    |
| <i>Solanum cinamomifolium</i>    | 30 | 3.75 | 109.6 | 5.82 | 2.702 | 13.5 | 13.31 | 0.406    |
| <i>Cletra scabra</i>             | 35 | 4.38 | 127.9 | 4.35 | 2.017 | 15.5 | 13.02 | 0.171    |
| <i>Casearia arborea</i>          | 44 | 5.5  | 160.8 | 2.37 | 1.101 | 18.5 | 13    | 0.253    |
| <i>Guatteria nigrensis</i> **    | 34 | 4.25 | 124.2 | 3.22 | 1.494 | 15   | 11.63 | 0.220    |
| <i>Vochysia magnifica</i> **     | 9  | 1.13 | 32.9  | 9.09 | 4.216 | 4    | 11.32 | 0.334    |
| Indet.                           | 20 | 2.5  | 73.1  | 4.96 | 2.3   | 9    | 9.95  |          |
| <i>Myrcia splendens</i>          | 24 | 3    | 87.7  | 3.52 | 1.633 | 11.5 | 9.7   | 0.203    |
| <i>Nectandra lanceolata</i> **   | 24 | 3    | 87.7  | 3.5  | 1.622 | 11.5 | 9.68  | 0.181    |
| <i>Symplocos uniflora</i>        | 20 | 2.5  | 73.1  | 4.3  | 1.994 | 9.5  | 9.43  | 0.222    |
| <i>Eugenia involucrata</i>       | 24 | 3    | 87.7  | 1.77 | 0.82  | 11   | 7.81  | 0.197    |
| <i>Amaioua guianensis</i>        | 27 | 3.38 | 98.6  | 1.21 | 0.56  | 10.5 | 7.49  | 0.210    |
| <i>Alchornea triplinervea</i>    | 19 | 2.38 | 69.4  | 1.97 | 0.914 | 9    | 6.84  | 0.348    |
| <i>Gordonia semiserrata</i>      | 16 | 2    | 58.5  | 2.38 | 1.104 | 7.5  | 6.46  | 0.296    |
| <i>Tovomitopsis saldanhae</i> ** | 20 | 2.5  | 73.1  | 1.18 | 0.548 | 9    | 6.17  | 0.244    |
| <i>Persea pyrifolia</i>          | 7  | 0.88 | 25.6  | 3.59 | 1.664 | 3.5  | 5.43  | 0.197    |
| <i>Cordia sellowiana</i>         | 14 | 1.75 | 51.1  | 0.92 | 0.425 | 5.5  | 4.19  | 0.194    |
| <i>Sclerolobium sp</i>           | 6  | 0.75 | 21.9  | 2.24 | 1.038 | 3    | 3.82  | 0.368    |
| <i>Psychotria sessilis</i>       | 13 | 1.63 | 47.5  | 0.46 | 0.214 | 5.5  | 3.61  | 0.317    |
| <i>Mirsine ferruginea</i>        | 10 | 1.25 | 36.5  | 1.09 | 0.507 | 4.5  | 3.59  | 0.250    |
| <i>Cyathea delgadii</i> **       | 11 | 1.38 | 40.2  | 0.89 | 0.412 | 4.5  | 3.51  | 0.195    |
| <i>Miconia sellowiana</i>        | 10 | 1.25 | 36.5  | 0.85 | 0.394 | 5    | 3.48  | 0.368    |
| <i>Cecropia hololeuca</i> *      | 4  | 0.5  | 14.6  | 2.3  | 1.066 | 2    | 3.35  | 0.238    |
| Myrtaceae sp                     | 10 | 1.25 | 36.5  | 0.7  | 0.325 | 5    | 3.34  |          |
| <i>Allophylus edulis</i>         | 9  | 1.13 | 32.9  | 0.95 | 0.439 | 4.5  | 3.32  | 0.316    |
| <i>Cinnamomum glaziovii</i>      | 10 | 1.25 | 36.5  | 0.9  | 0.418 | 4    | 3.26  | 0.189    |
| <i>Ocotea odorifera</i> **       | 10 | 1.25 | 36.5  | 0.62 | 0.285 | 5    | 3.25  | 0.205    |
| <i>Lamanonia ternata</i>         | 9  | 1.13 | 32.9  | 0.69 | 0.318 | 4.5  | 3.06  | 0.159    |
| <i>Eremanthus erythropapa</i> *  | 3  | 0.38 | 11    | 2.16 | 1.004 | 1.5  | 2.95  | 0.278    |
| <i>Ilex thezans</i>              | 7  | 0.88 | 25.6  | 0.99 | 0.46  | 3.5  | 2.84  | 0.287    |
| <i>Ocotea cernua</i>             | 9  | 1.13 | 32.9  | 0.42 | 0.192 | 4.5  | 2.79  | 0.203    |
| <i>Didimopanax calvus</i>        | 7  | 0.88 | 25.6  | 0.86 | 0.397 | 3.5  | 2.7   | 0.277    |
| <i>Myrsine schwaqueana</i>       | 9  | 1.13 | 32.9  | 0.6  | 0.279 | 3    | 2.56  | 0.270    |
| <i>Styrax sp</i>                 | 6  | 0.75 | 21.9  | 0.97 | 0.451 | 3    | 2.55  | 0.189    |
| Indet.2                          | 8  | 1    | 29.2  | 0.57 | 0.266 | 3.5  | 2.54  |          |
| <i>Ilex cf taubertiana</i>       | 7  | 0.88 | 25.6  | 0.75 | 0.349 | 3    | 2.46  | 0.248    |
| <i>Faramea sp</i>                | 8  | 1    | 29.2  | 0.32 | 0.148 | 4    | 2.43  | 0.428    |
| <i>Qualea sp</i>                 | 4  | 0.5  | 14.6  | 1.36 | 0.631 | 2    | 2.42  | 0.271    |
| <i>Sapium glandulatum</i>        | 4  | 0.5  | 14.6  | 1.42 | 0.66  | 1.5  | 2.34  | 0.577    |

To be continued...

Table 2 - Continuation

| SPECIES                               | N | RA   | AA   | RBA  | ABA   | FR  | IV   | PF<br>RATIO |
|---------------------------------------|---|------|------|------|-------|-----|------|-------------|
| <i>Nectandra rigida</i>               | 7 | 0.88 | 25.6 | 0.6  | 0.28  | 3   | 2.31 |             |
| <i>Endlicheria paniculata**</i>       | 7 | 0.88 | 25.6 | 0.46 | 0.215 | 3.5 | 2.31 | 0.289       |
| <i>Tibouchina granulosa*</i>          | 7 | 0.88 | 25.6 | 0.54 | 0.252 | 3   | 2.25 | 0.273       |
| <i>Solanum swartzianum</i>            | 7 | 0.88 | 25.6 | 0.63 | 0.294 | 2.5 | 2.2  | 0.420       |
| <i>Miconia eichleri</i>               | 8 | 1    | 29.2 | 0.24 | 0.112 | 3   | 2.07 | 0.336       |
| <i>Mollinedia triflora</i>            | 6 | 0.75 | 21.9 | 0.29 | 0.134 | 3   | 1.87 | 0.224       |
| <i>Sclerolobium rugosum</i>           | 3 | 0.38 | 11   | 1.02 | 0.471 | 1.5 | 1.81 | 0.202       |
| <i>Cupania vernalis</i>               | 5 | 0.63 | 18.3 | 0.34 | 0.159 | 2.5 | 1.66 | 0.281       |
| <i>Piptocarpha macropoda*</i>         | 3 | 0.38 | 11   | 0.84 | 0.39  | 1.5 | 1.63 | 0.305       |
| <i>Miconia discolor</i>               | 5 | 0.63 | 18.3 | 0.3  | 0.138 | 2.5 | 1.62 |             |
| <i>Inga sessilis*</i>                 | 3 | 0.38 | 11   | 0.82 | 0.381 | 1.5 | 1.61 | 0.340       |
| <i>Aniba firmula</i>                  | 3 | 0.38 | 11   | 0.62 | 0.289 | 1.5 | 1.41 |             |
| <i>Guatteria mexiae</i>               | 4 | 0.5  | 14.6 | 0.27 | 0.124 | 2   | 1.32 | 0.229       |
| <i>Ilex paraguariensis</i>            | 3 | 0.38 | 11   | 0.52 | 0.242 | 1.5 | 1.31 | 0.260       |
| <i>Nectandra oppositifolia**</i>      | 3 | 0.38 | 11   | 0.52 | 0.241 | 1.5 | 1.31 | 0.186       |
| <i>Rollinia laurifolia</i>            | 4 | 0.5  | 14.6 | 0.23 | 0.108 | 2   | 1.29 | 0.493       |
| <i>Cordia</i> sp                      | 4 | 0.5  | 14.6 | 0.23 | 0.108 | 2   | 1.29 | 0.202       |
| <i>Maytenus robusta</i>               | 4 | 0.5  | 14.6 | 0.21 | 0.096 | 2   | 1.26 | 0.223       |
| <i>Symplocos</i> sp                   | 3 | 0.38 | 11   | 0.43 | 0.198 | 1.5 | 1.22 |             |
| <i>Mollinedia ovata</i>               | 4 | 0.5  | 14.6 | 0.22 | 0.102 | 1.5 | 1.14 | 0.227       |
| <i>Aloysia virgata*</i>               | 3 | 0.38 | 11   | 0.32 | 0.146 | 1.5 | 1.11 | 0.236       |
| <i>Solanum leucodendron</i>           | 3 | 0.38 | 11   | 0.25 | 0.117 | 1.5 | 1.04 |             |
| <i>Vitex megapotamica</i>             | 3 | 0.38 | 11   | 0.21 | 0.096 | 1.5 | 1    |             |
| <i>Vochysia schwaqueana</i>           | 3 | 0.38 | 11   | 0.19 | 0.087 | 1.5 | 0.98 |             |
| <i>Vitex triflora</i>                 | 3 | 0.38 | 11   | 0.17 | 0.079 | 1.5 | 0.96 |             |
| <i>Matayba elagnoides</i>             | 3 | 0.38 | 11   | 0.16 | 0.073 | 1.5 | 0.95 |             |
| <i>Cabralea canjerana</i>             | 3 | 0.38 | 11   | 0.15 | 0.067 | 1.5 | 0.94 |             |
| <i>Dyctioloma vandelianum</i>         | 1 | 0.13 | 3.7  | 0.64 | 0.296 | 0.5 | 0.9  |             |
| <i>Eugenia cerasiflora</i>            | 3 | 0.38 | 11   | 0.1  | 0.044 | 1.5 | 0.89 |             |
| <i>Cyathea rufa</i>                   | 3 | 0.38 | 11   | 0.23 | 0.105 | 1   | 0.88 |             |
| <i>Matayba</i> sp                     | 3 | 0.38 | 11   | 0.05 | 0.025 | 1.5 | 0.84 |             |
| <i>Piper gigantifolium</i>            | 3 | 0.38 | 11   | 0.15 | 0.071 | 1   | 0.81 |             |
| <i>Eugenia cuprea</i>                 | 3 | 0.38 | 11   | 0.09 | 0.043 | 1   | 0.75 |             |
| <i>Prunus sellowi</i>                 | 2 | 0.25 | 7.3  | 0.2  | 0.093 | 1   | 0.73 |             |
| <i>Sorocea bomplandii</i>             | 2 | 0.25 | 7.3  | 0.15 | 0.068 | 1   | 0.67 |             |
| <i>Carpotroche<br/>brasiliensis**</i> | 2 | 0.25 | 7.3  | 0.13 | 0.058 | 1   | 0.65 |             |
| <i>Pouteria macahensis</i>            | 2 | 0.25 | 7.3  | 0.1  | 0.047 | 1   | 0.63 |             |
| <i>Dalbergia cf brasiliensis</i>      | 2 | 0.25 | 7.3  | 0.07 | 0.033 | 1   | 0.6  |             |
| <i>Pouteria</i> sp                    | 2 | 0.25 | 7.3  | 0.07 | 0.03  | 1   | 0.59 |             |
| <i>Picramnia ciliata</i>              | 2 | 0.25 | 7.3  | 0.06 | 0.027 | 1   | 0.59 |             |
| <i>Didimopanax</i> sp                 | 2 | 0.25 | 7.3  | 0.06 | 0.027 | 1   | 0.59 |             |
| <i>Euplassa</i> sp                    | 2 | 0.25 | 7.3  | 0.06 | 0.027 | 1   | 0.59 |             |

To be continued...

Table 2 - Continuation

| SPECIES                         | N | RA   | AA  | RBA  | ABA   | FR  | IV   | PF<br>RATIO |
|---------------------------------|---|------|-----|------|-------|-----|------|-------------|
| <i>Zanthoxylum rhoifolium</i>   | 1 | 0.13 | 3.7 | 0.25 | 0.115 | 0.5 | 0.51 |             |
| <i>Melastomataceae</i>          | 1 | 0.13 | 3.7 | 0.24 | 0.111 | 0.5 | 0.5  |             |
| <i>Nectandra reticulata</i>     | 1 | 0.13 | 3.7 | 0.23 | 0.107 | 0.5 | 0.49 |             |
| <i>Lauraceae</i>                | 1 | 0.13 | 3.7 | 0.2  | 0.094 | 0.5 | 0.47 |             |
| <i>Cedrella fissilis</i>        | 1 | 0.13 | 3.7 | 0.2  | 0.092 | 0.5 | 0.46 |             |
| <i>Clusia arrudea</i>           | 1 | 0.13 | 3.7 | 0.2  | 0.091 | 0.5 | 0.46 |             |
| <i>Hyeronima alchornioides</i>  | 1 | 0.13 | 3.7 | 0.19 | 0.086 | 0.5 | 0.45 |             |
| <i>Leandra lacunosa</i>         | 1 | 0.13 | 3.7 | 0.17 | 0.078 | 0.5 | 0.43 |             |
| <i>Miconia cinamomifolia</i>    | 1 | 0.13 | 3.7 | 0.13 | 0.058 | 0.5 | 0.39 |             |
| <i>Roupala brasiliensis</i>     | 1 | 0.13 | 3.7 | 0.09 | 0.043 | 0.5 | 0.36 |             |
| <i>Rhedia gardneriana</i>       | 1 | 0.13 | 3.7 | 0.08 | 0.037 | 0.5 | 0.34 |             |
| <i>Casearia obliqua</i>         | 1 | 0.13 | 3.7 | 0.08 | 0.036 | 0.5 | 0.34 |             |
| <i>Mollinedia cf argyrogyne</i> | 1 | 0.13 | 3.7 | 0.06 | 0.029 | 0.5 | 0.33 |             |
| <i>Ocotea dispersa</i>          | 1 | 0.13 | 3.7 | 0.05 | 0.021 | 0.5 | 0.31 |             |
| <i>Coussapoa microcarpa</i>     | 1 | 0.13 | 3.7 | 0.04 | 0.019 | 0.5 | 0.31 |             |
| <i>Cecropia glaziovii</i>       | 1 | 0.13 | 3.7 | 0.04 | 0.016 | 0.5 | 0.3  |             |
| <i>Aspidosperma olivaceum</i>   | 1 | 0.13 | 3.7 | 0.04 | 0.016 | 0.5 | 0.3  |             |
| <i>Casearia decandra</i>        | 1 | 0.13 | 3.7 | 0.04 | 0.016 | 0.5 | 0.3  |             |
| <i>Casearia gossypiosperma</i>  | 1 | 0.13 | 3.7 | 0.03 | 0.015 | 0.5 | 0.3  |             |
| <i>Myrsine umbelata</i>         | 1 | 0.13 | 3.7 | 0.03 | 0.012 | 0.5 | 0.29 |             |
| <i>Swartzia sp</i>              | 1 | 0.13 | 3.7 | 0.02 | 0.01  | 0.5 | 0.29 |             |
| <i>Parapiptadenia sp</i>        | 1 | 0.13 | 3.7 | 0.02 | 0.008 | 0.5 | 0.28 |             |
| <i>Tapirira guianensis</i>      | 1 | 0.13 | 3.7 | 0.02 | 0.007 | 0.5 | 0.28 |             |
| <i>Miconia ibaguensis</i>       | 1 | 0.13 | 3.7 | 0.01 | 0.006 | 0.5 | 0.28 |             |

## REFERENCES

- Mueller-Dombois, D., Ellenberg, H. 1974. Aims and methods of vegetation ecology. New York, John Wiley and Sons.
- Newton, A. 2007. Forest ecology and conservation: a handbook of techniques. Oxford, Oxford University Press.
